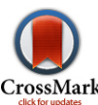

## Correction

# Correction: The Musicality of Non-Musicians: An Index for Assessing Musical Sophistication in the General Population

## The PLOS ONE Staff

In the third paragraph of the Results and Discussion section under Study 2: Assessing the Adequacy of the New Self-Report Inventory, the reference should be “(see Table 1).”

In the first paragraph of the Results and Discussion section of Study 3: Reliability, Validity and Correlates of the Self-Report Inventory, the second sentence should read: “As Table 2 shows, all scales possess good or very good estimates of internal reliability.”

In the first sentence of the fourth paragraph under the heading for Study 3: Reliability, Validity and Correlates of the Self-Report Inventory, the wrong name is used for the questionnaire. The correct name is the “Musical Experience Questionnaire.”

Table S4 in File S1 is missing a decimal separator and numerical values. Please see below for a complete File S1 with corrected Table 4.

## Supporting Information

**File S1. Table S1, Items of self-report inventory.** Values of Cronbach’s alpha are derived from the full sample of 147,633 participants. **Table S2, Inter-factor correlations for confirmatory model 4. Table S3, Data norms for subscales and general sophistication (sample n = 147,633). Table S4, Values of the test statistic and corresponding p-values derived from the conditional inference permutation tests for all socio-economic variables as well as self-reported musical training and active engagement influencing General Musical Sophistication scores as well as performance on the two listening tests.**

## Reference

1. Müllensiefen D, Gingras B, Musil J, Stewart L (2014) The Musicality of Non-Musicians: An Index for Assessing Musical Sophistication in the General Population. PLoS ONE 9(2): e89642. doi:10.1371/journal.pone.0089642

**Citation:** The PLOS ONE Staff (2014) Correction: The Musicality of Non-Musicians: An Index for Assessing Musical Sophistication in the General Population. PLOS ONE 9(6): e101091. doi:10.1371/journal.pone.0101091

**Published:** June 24, 2014

**Copyright:** © 2014 The PLOS ONE Staff. This is an open-access article distributed under the terms of the Creative Commons Attribution License, which permits unrestricted use, distribution, and reproduction in any medium, provided the original author and source are credited.
